# Supplementary material
Source: publisher figshare collection journal article supplement (https://acs.figshare.com/ndownloader/files/4691002)
Supplement: Supplementary file 1 [file 4691002]

## Supporting Information

### Formation of Hexacarbonylmanganese(I) Salts, $[\text{Mn}(\text{CO})_6]^+\text{X}^-$ , in Anhydrous HF

Jens Geier, Helge Willner, Christian W. Lehmann and Friedhelm Aubke

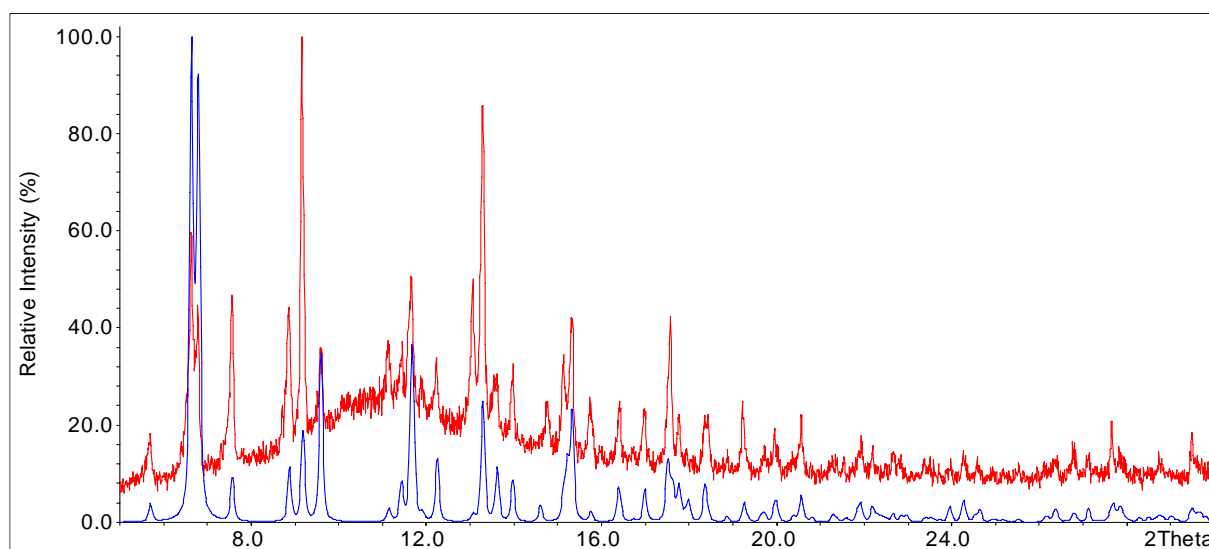

Figure S1. Experimental (red) and theoretical (blue) powder pattern of  $[\text{Mn}(\text{CO})_6][\text{BF}_4] \cdot \text{SO}_2$ . The calculation of the theoretical powder pattern utilises the atomic parameters of the 100 K single crystal structure in combination with the RT cell parameters of the experimental powder pattern.

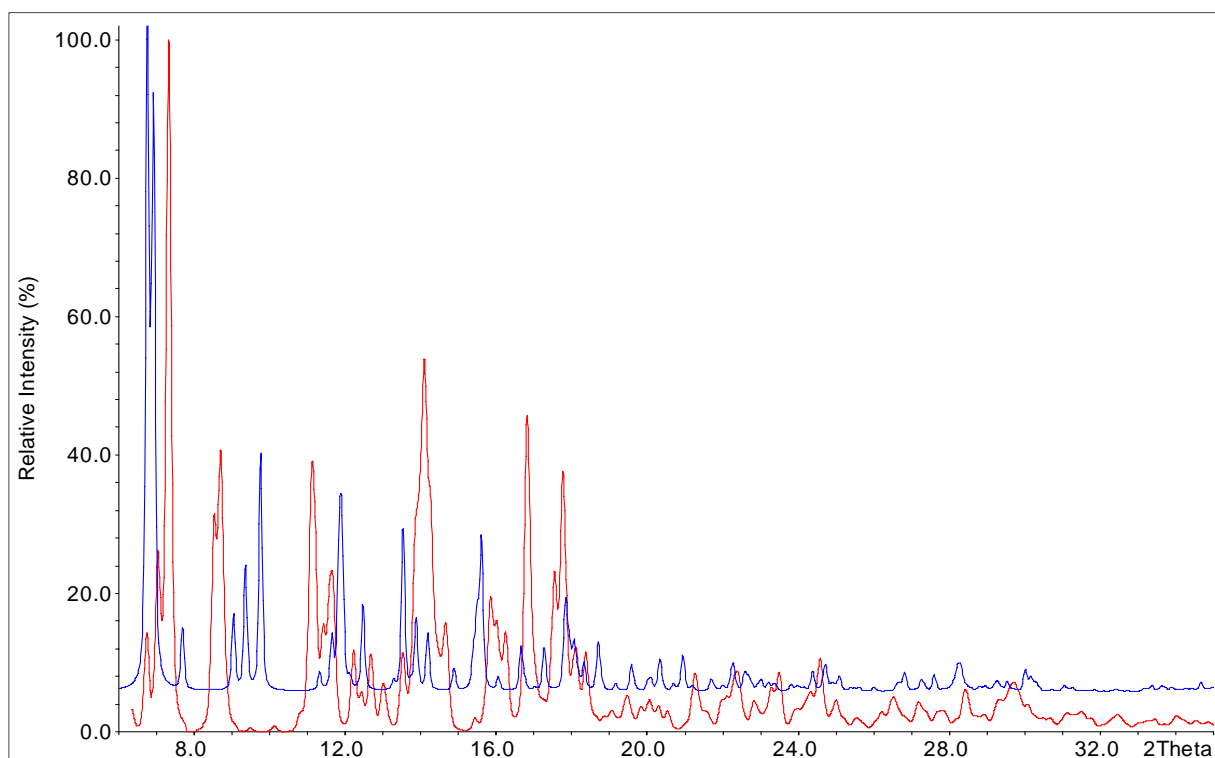

Figure S2. Comparison of the theoretical powder patterns of  $[\text{Mn}(\text{CO})_6][\text{BF}_4] \cdot \text{SO}_2$  (blue) and  $[\text{Mn}(\text{CO})_6][\text{BF}_4]$  (red) derived from single crystal intensity data ( $\text{SO}_2$ -free crystals were obtained from nitromethane solution; their quality was insufficient for a satisfying structure refinement).

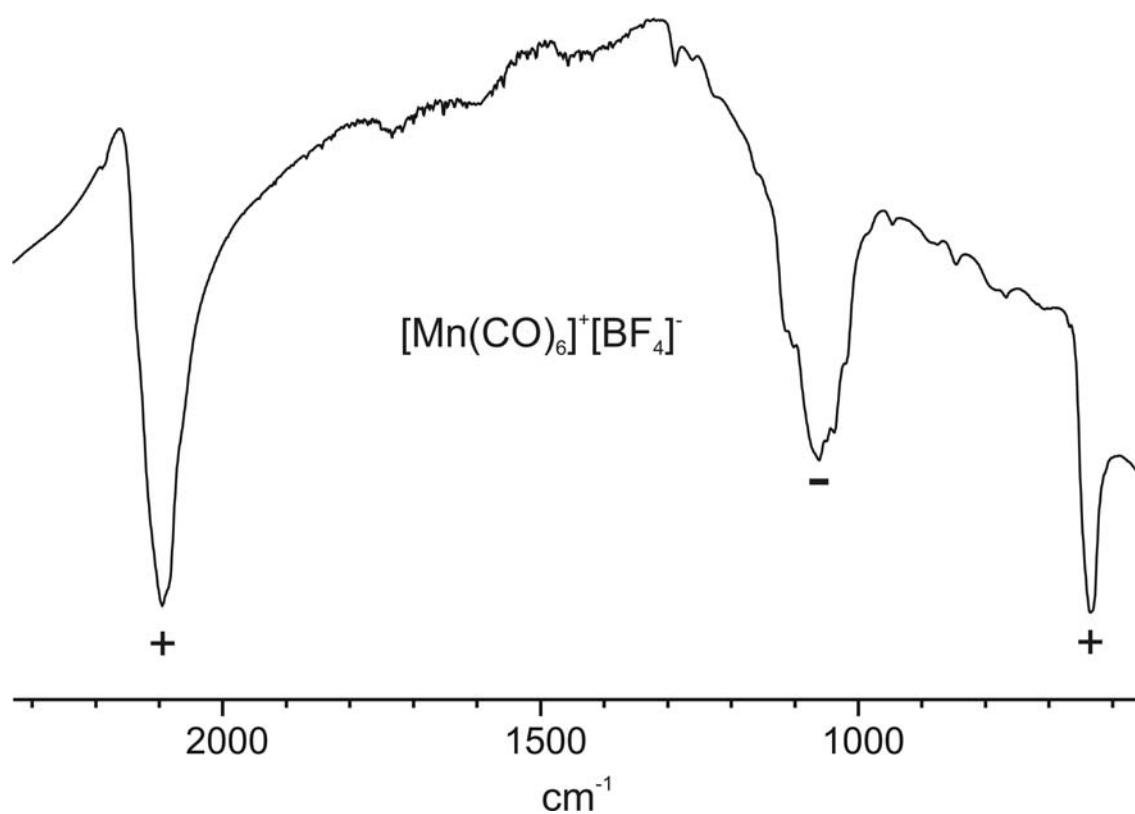

Figure S3: IR spectrum of solid  $[\text{Mn}(\text{CO})_6][\text{BF}_4]$ . Cation bands +, Anion bands -.

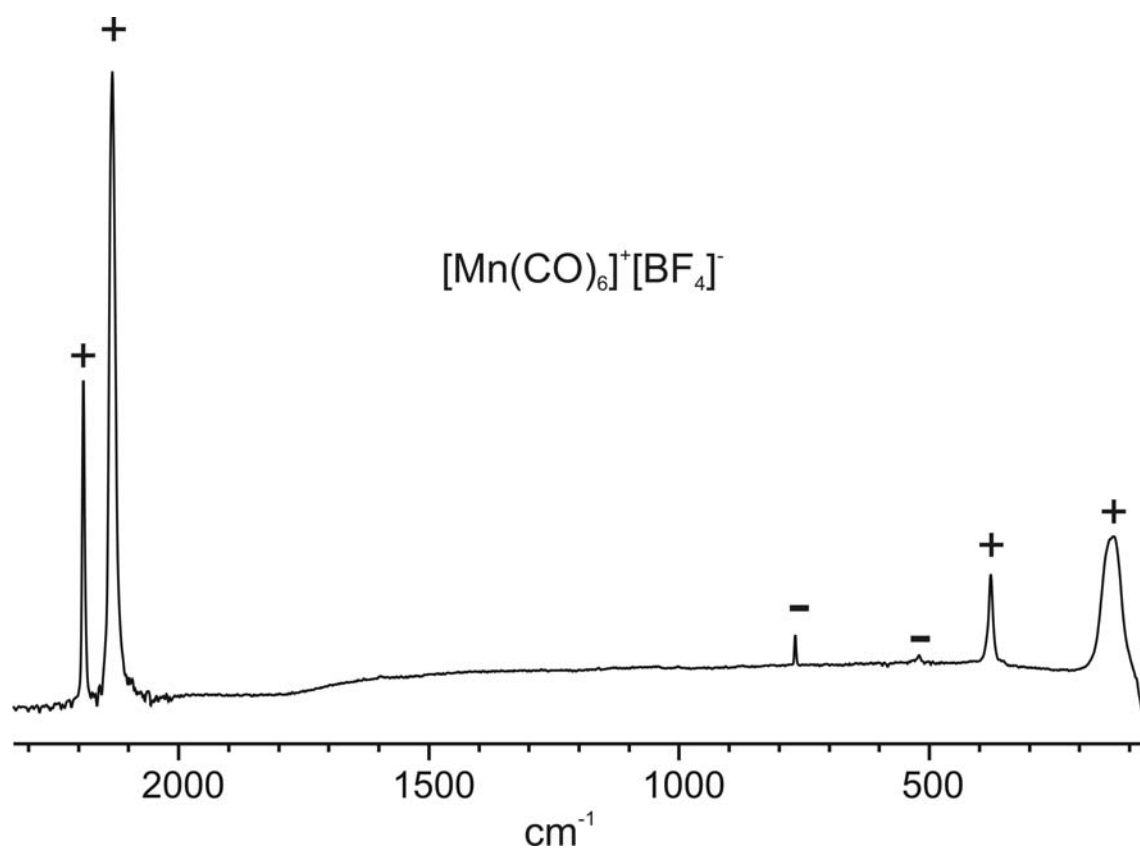

Figure S4: Raman spectrum of solid  $[\text{Mn}(\text{CO})_6][\text{BF}_4]$ . Cation bands +, Anion bands -.

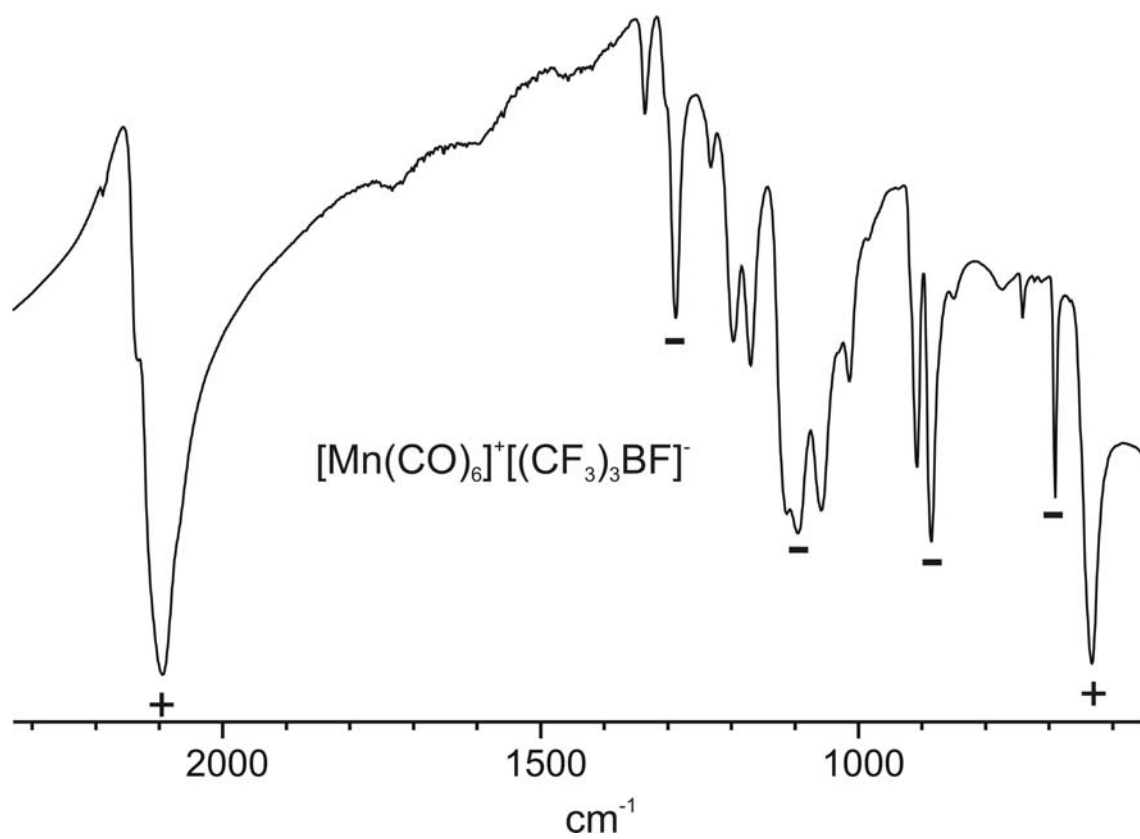

Figure S5: IR spectrum of solid  $[\text{Mn}(\text{CO})_6][(\text{CF}_3)_3\text{BF}]$ . Cation bands +, Anion bands -.

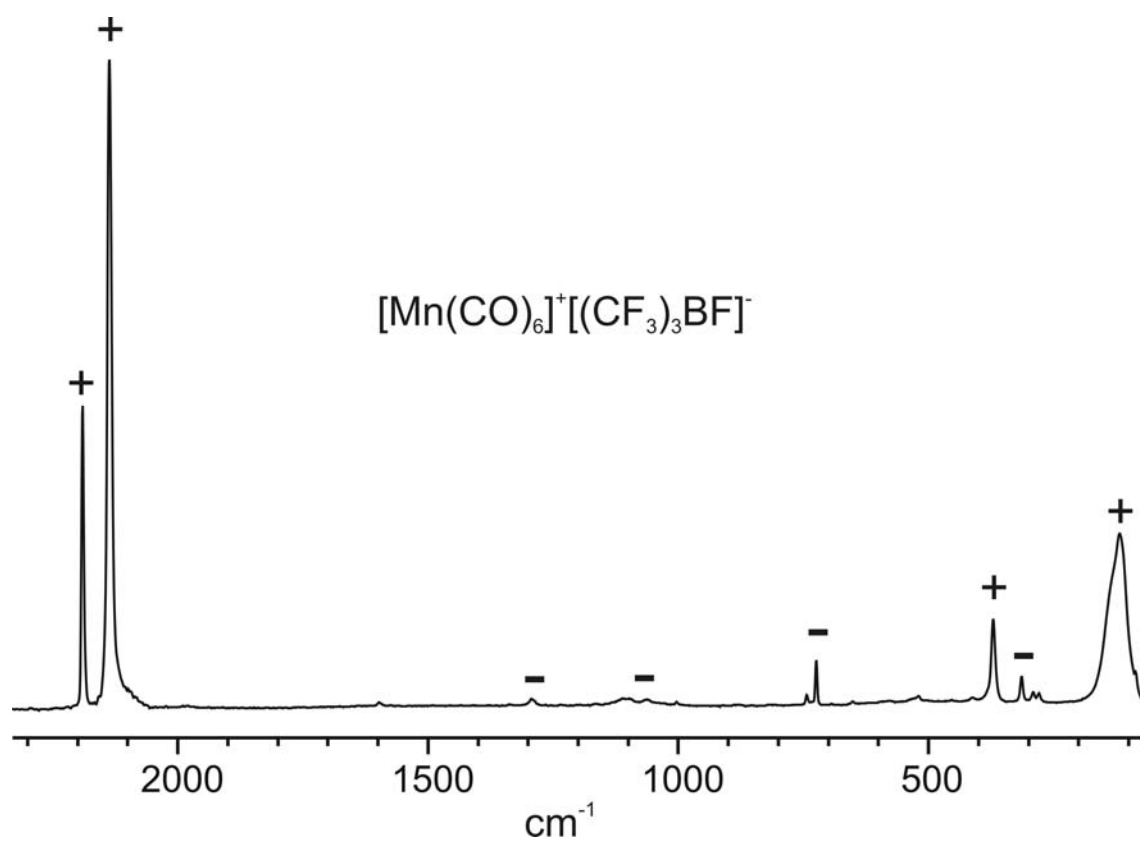

Figure S6: Raman spectrum of solid  $[\text{Mn}(\text{CO})_6][(\text{CF}_3)_3\text{BF}]$ . Cation bands +, Anion bands -

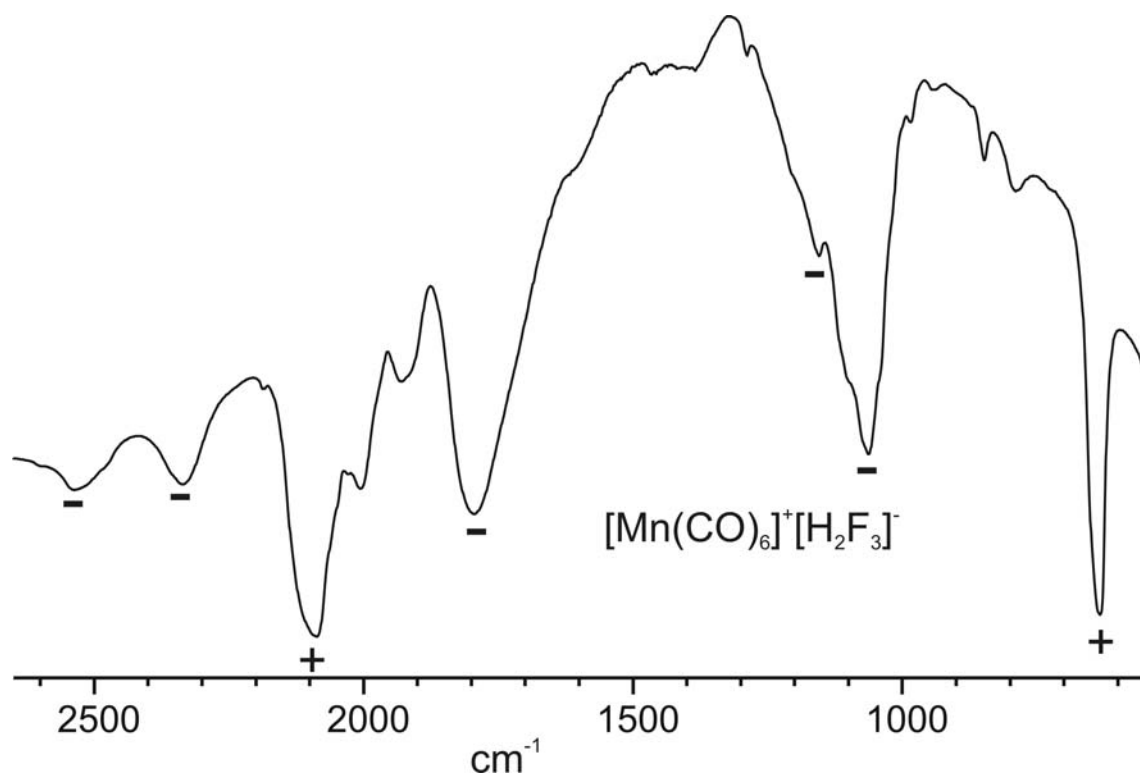

Figure S7: IR spectrum of solid  $[\text{Mn}(\text{CO})_6][\text{H}_2\text{F}_3]$ . Cation bands +, Anion bands -

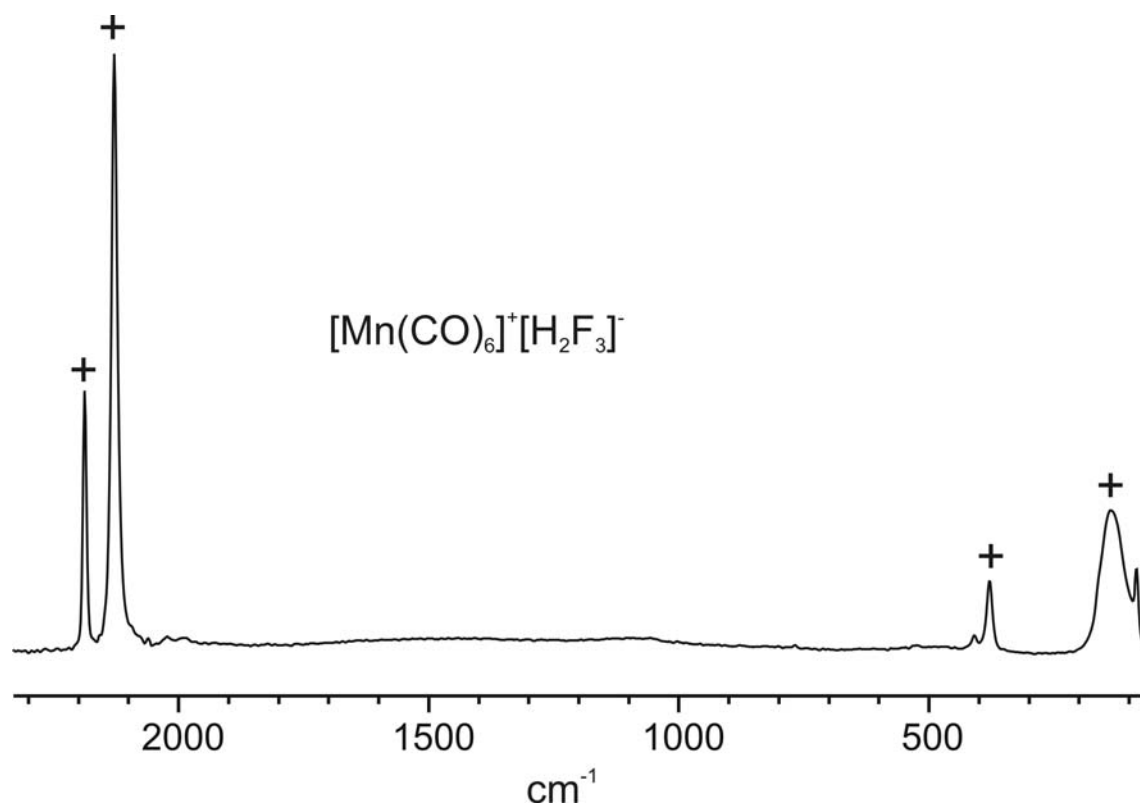

Figure S8: Raman spectrum of solid  $[\text{Mn}(\text{CO})_6][\text{H}_2\text{F}_3]$ . Cation bands +, Anion bands -
